# Supplementary material
Source: Springer Nature journal article supplement (https://www.springermedizin.de/resource/supplementary/12936_2009_1177_MOESM3_ESM.pdf/9550056)

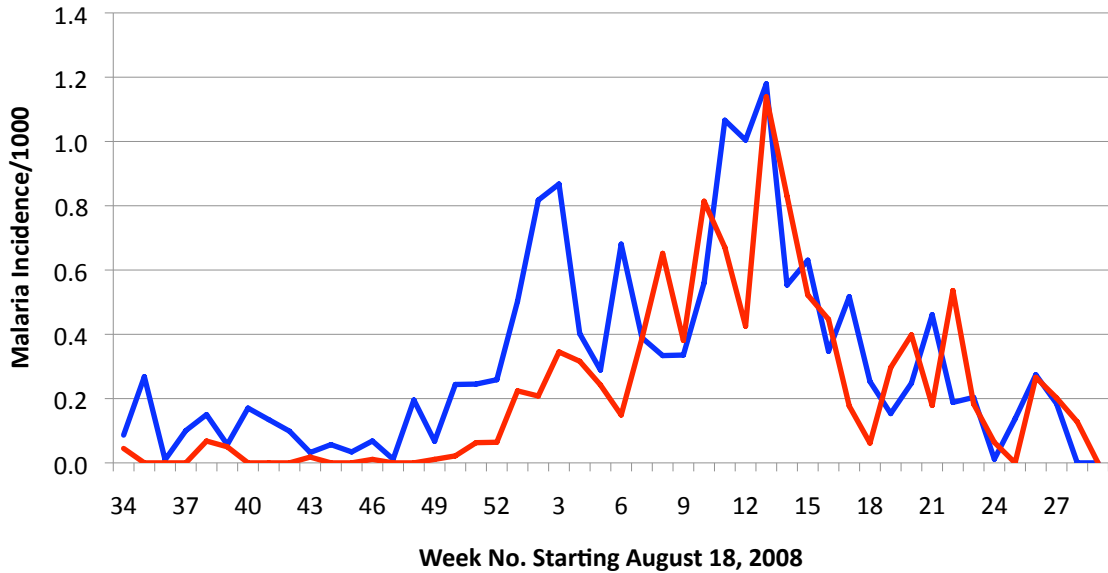

— Kafue Flats — Macha Heartland

Supplement: MOESM3 [file 9550056]
